# Supplementary material
Source: PubMed Central journal article supplement (PMC3755620)

**Externally Sensitized Deprotection of PPG-Masked Carbonyls as a Spatial Proximity  
Probe in Photoamplified Detection of Binding Events.**

Tiffany P. Gustafson, Greg A. Metzel, and Andrei G. Kutateladze\*

*Department of Chemistry and Biochemistry, University of Denver, Denver, CO 80208.*

**Supporting Information**

**(NMR SPECTRA)**

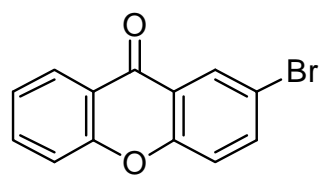

3

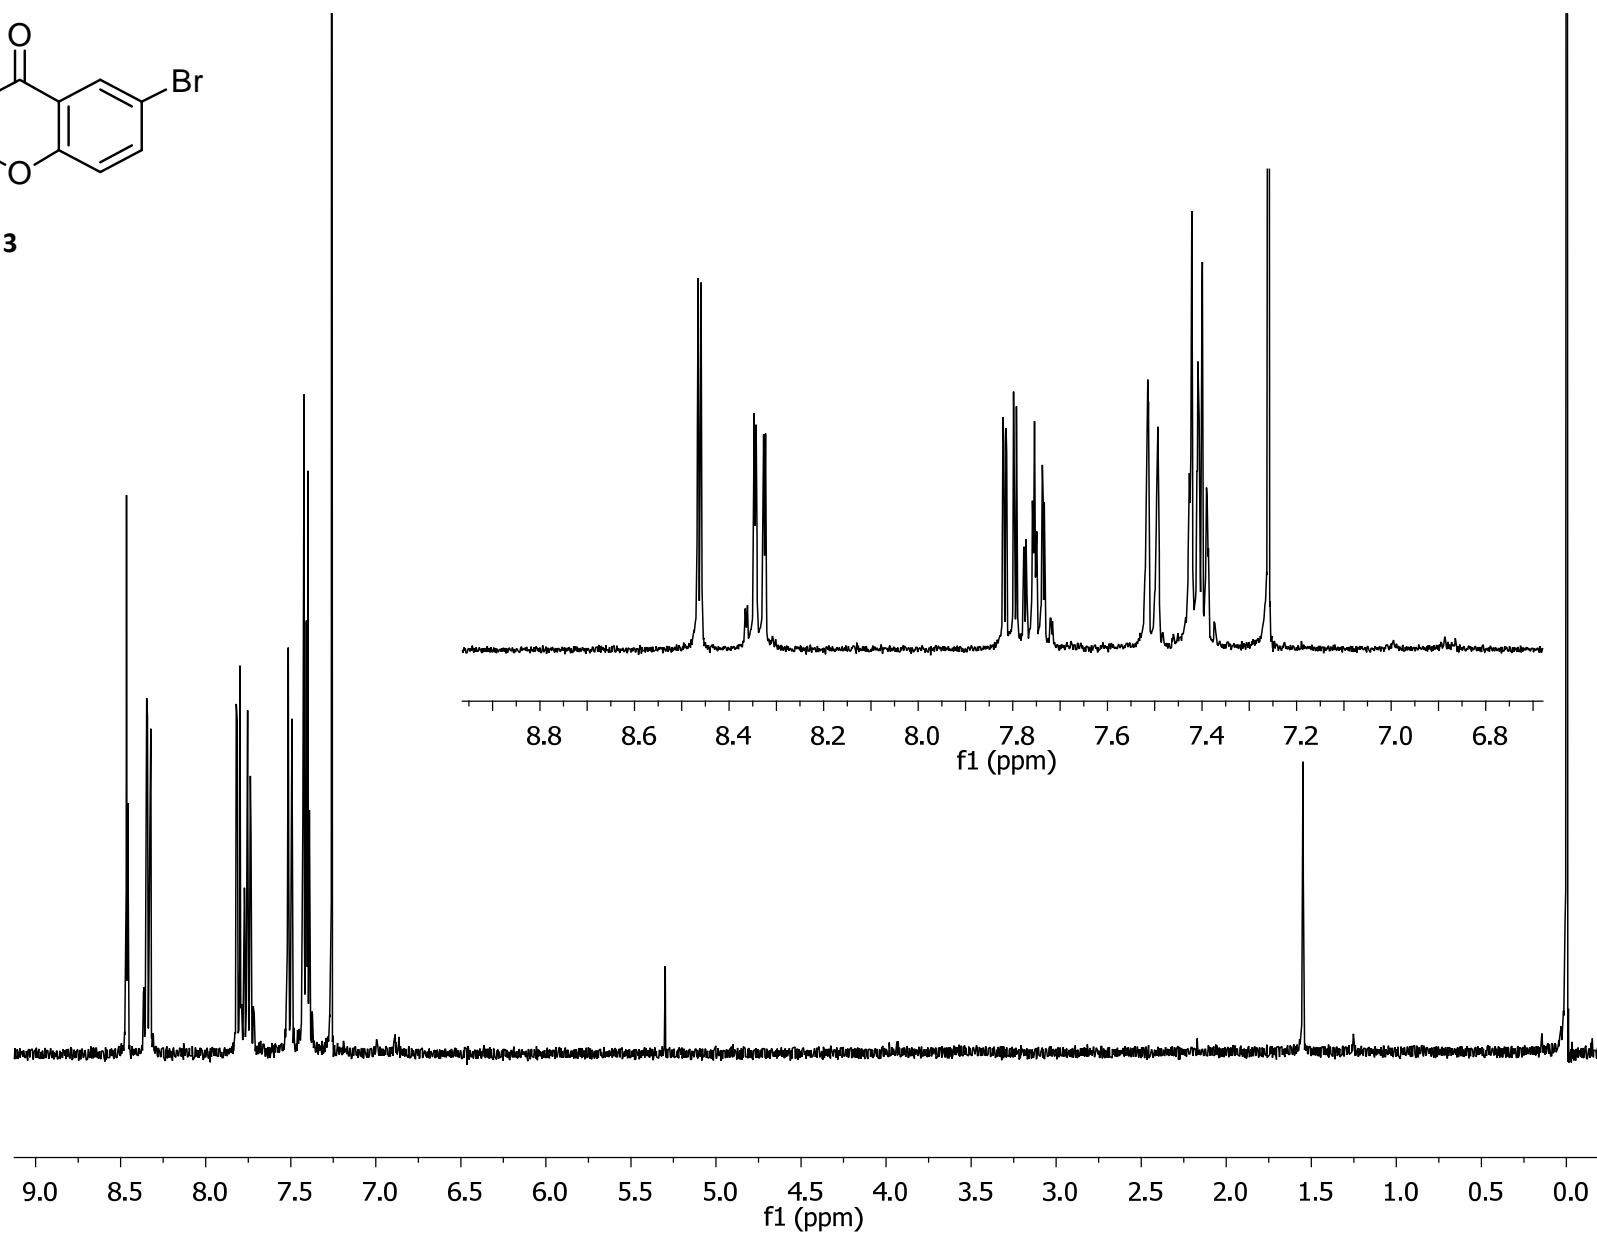

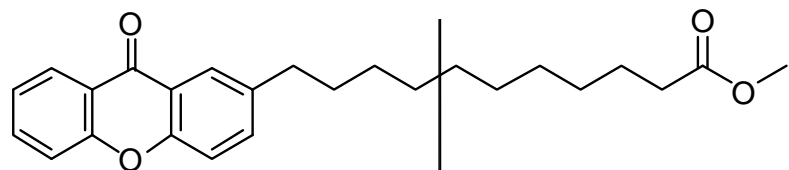

5

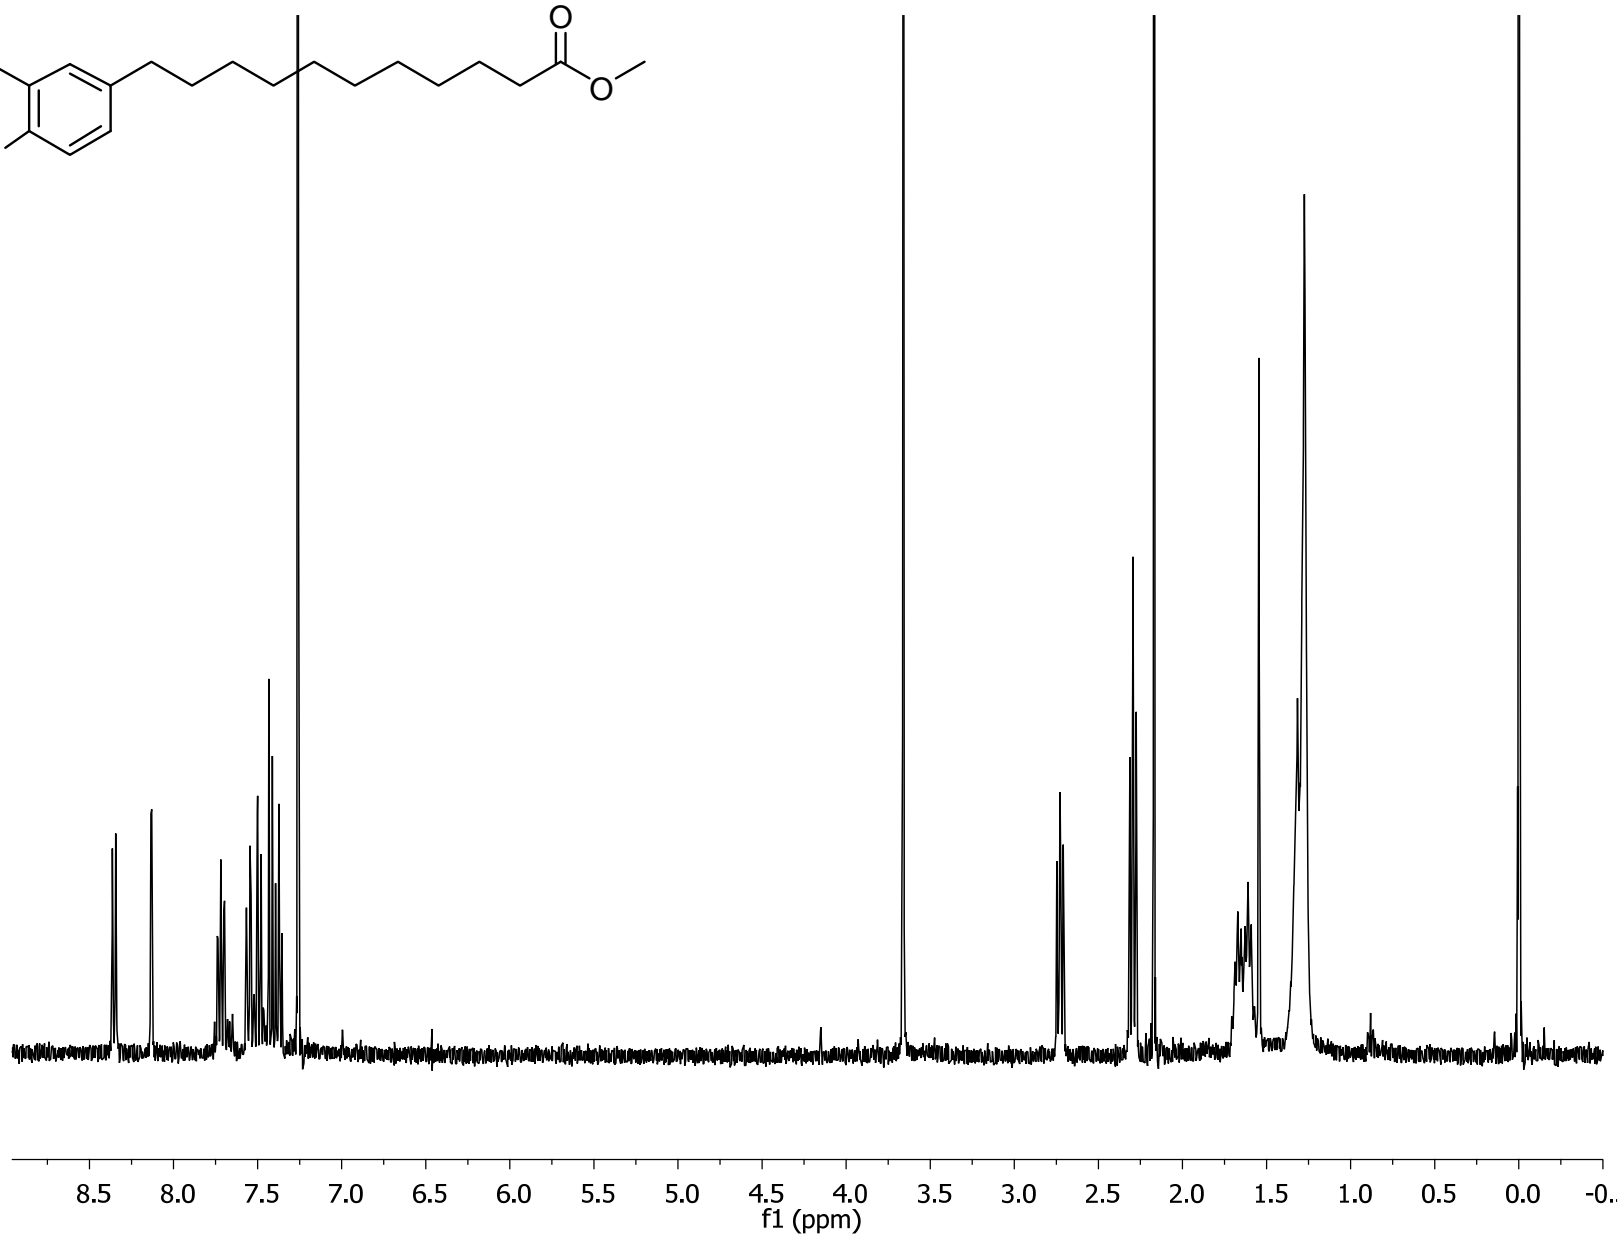

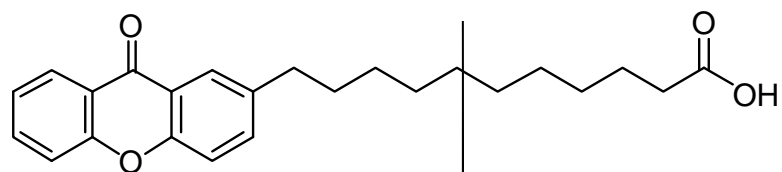

6

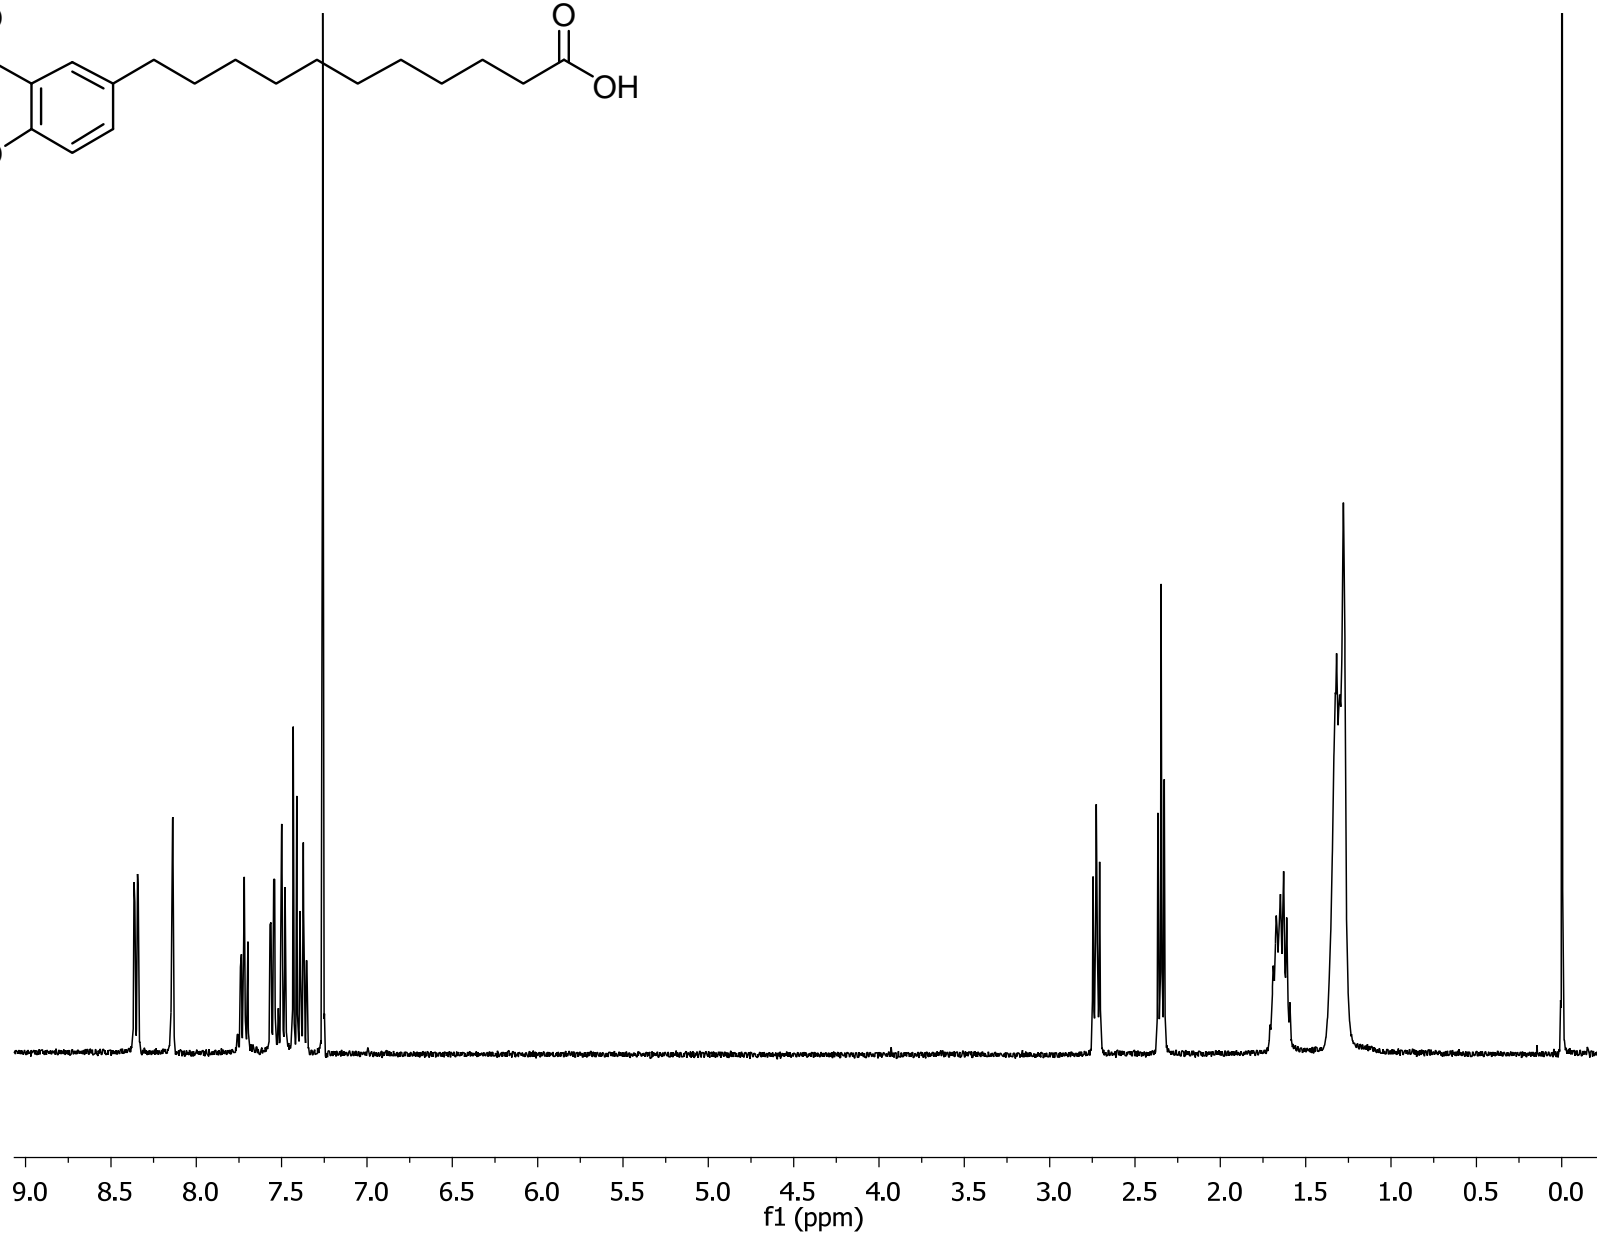

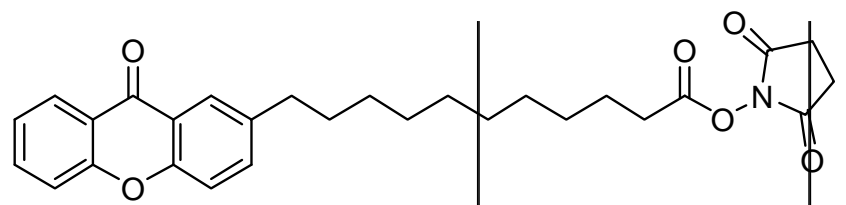

7

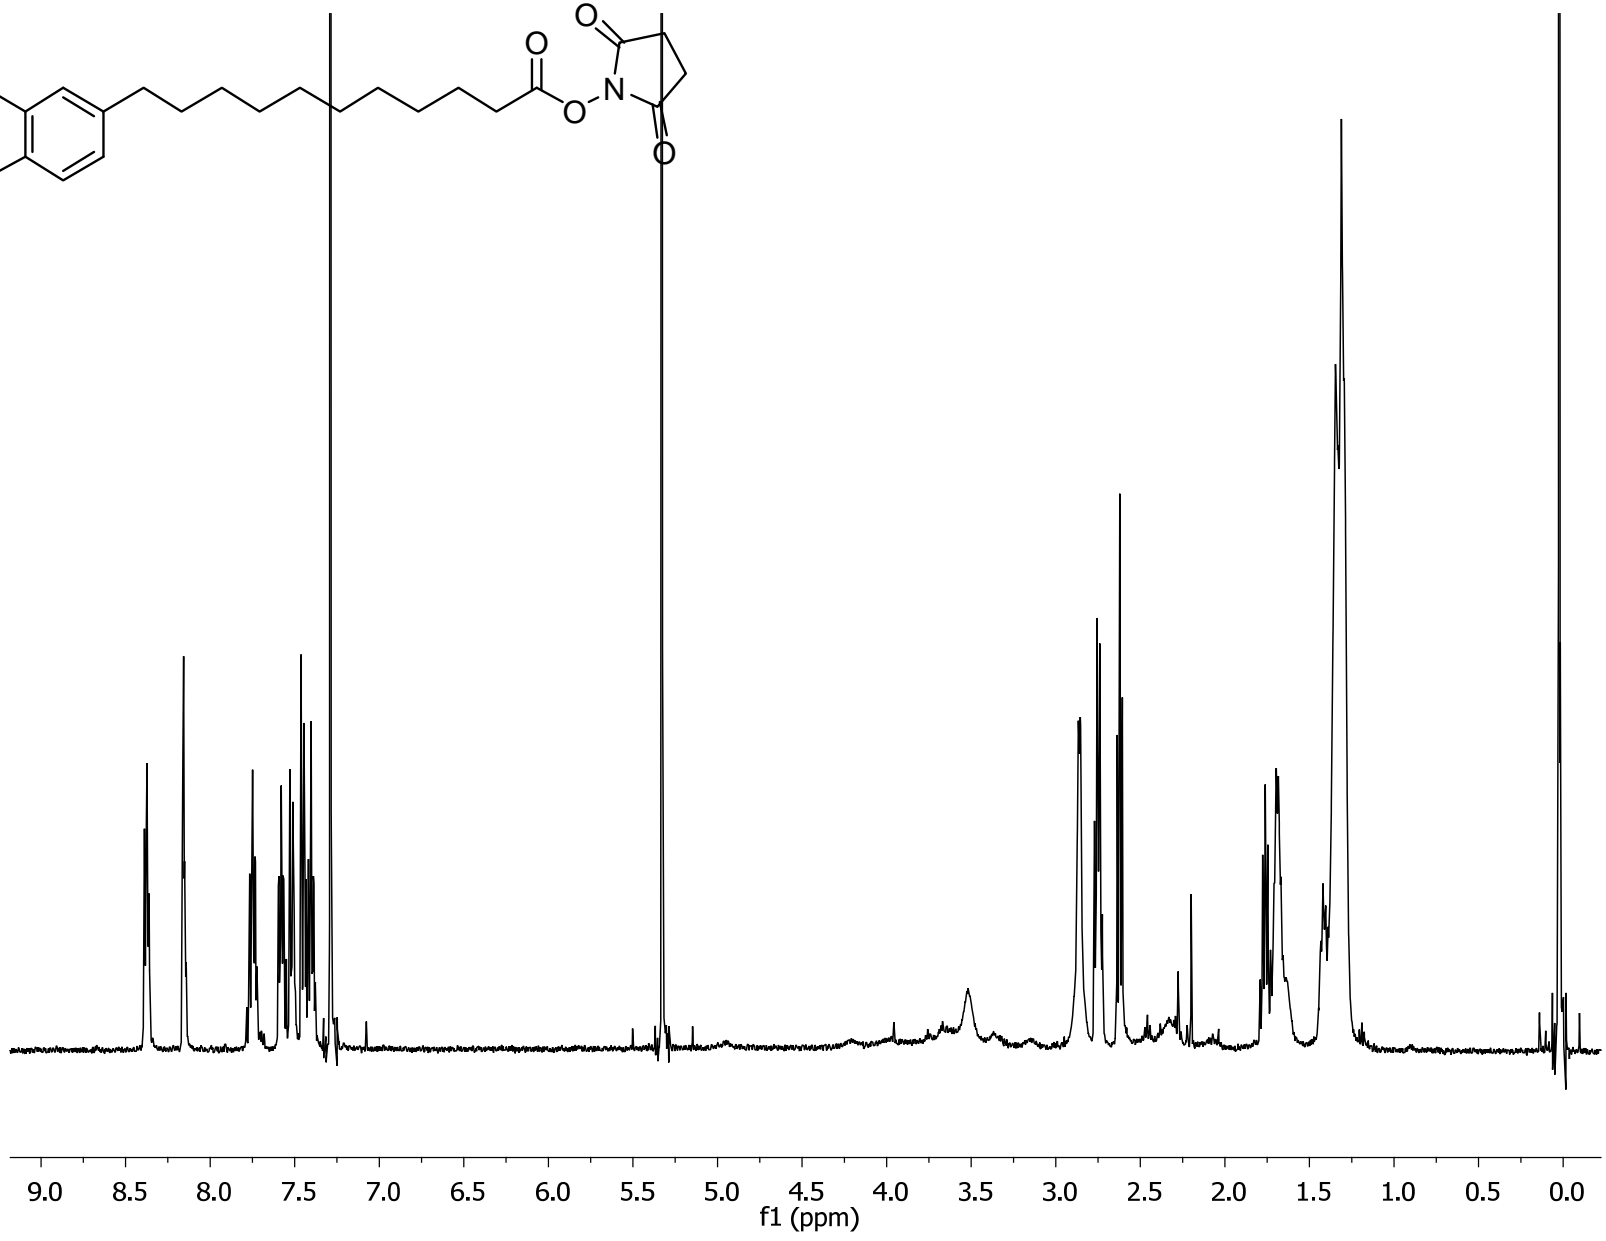

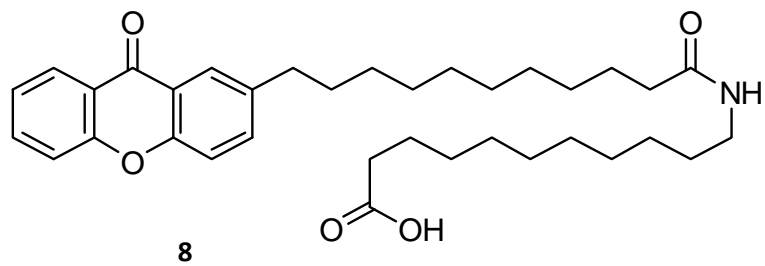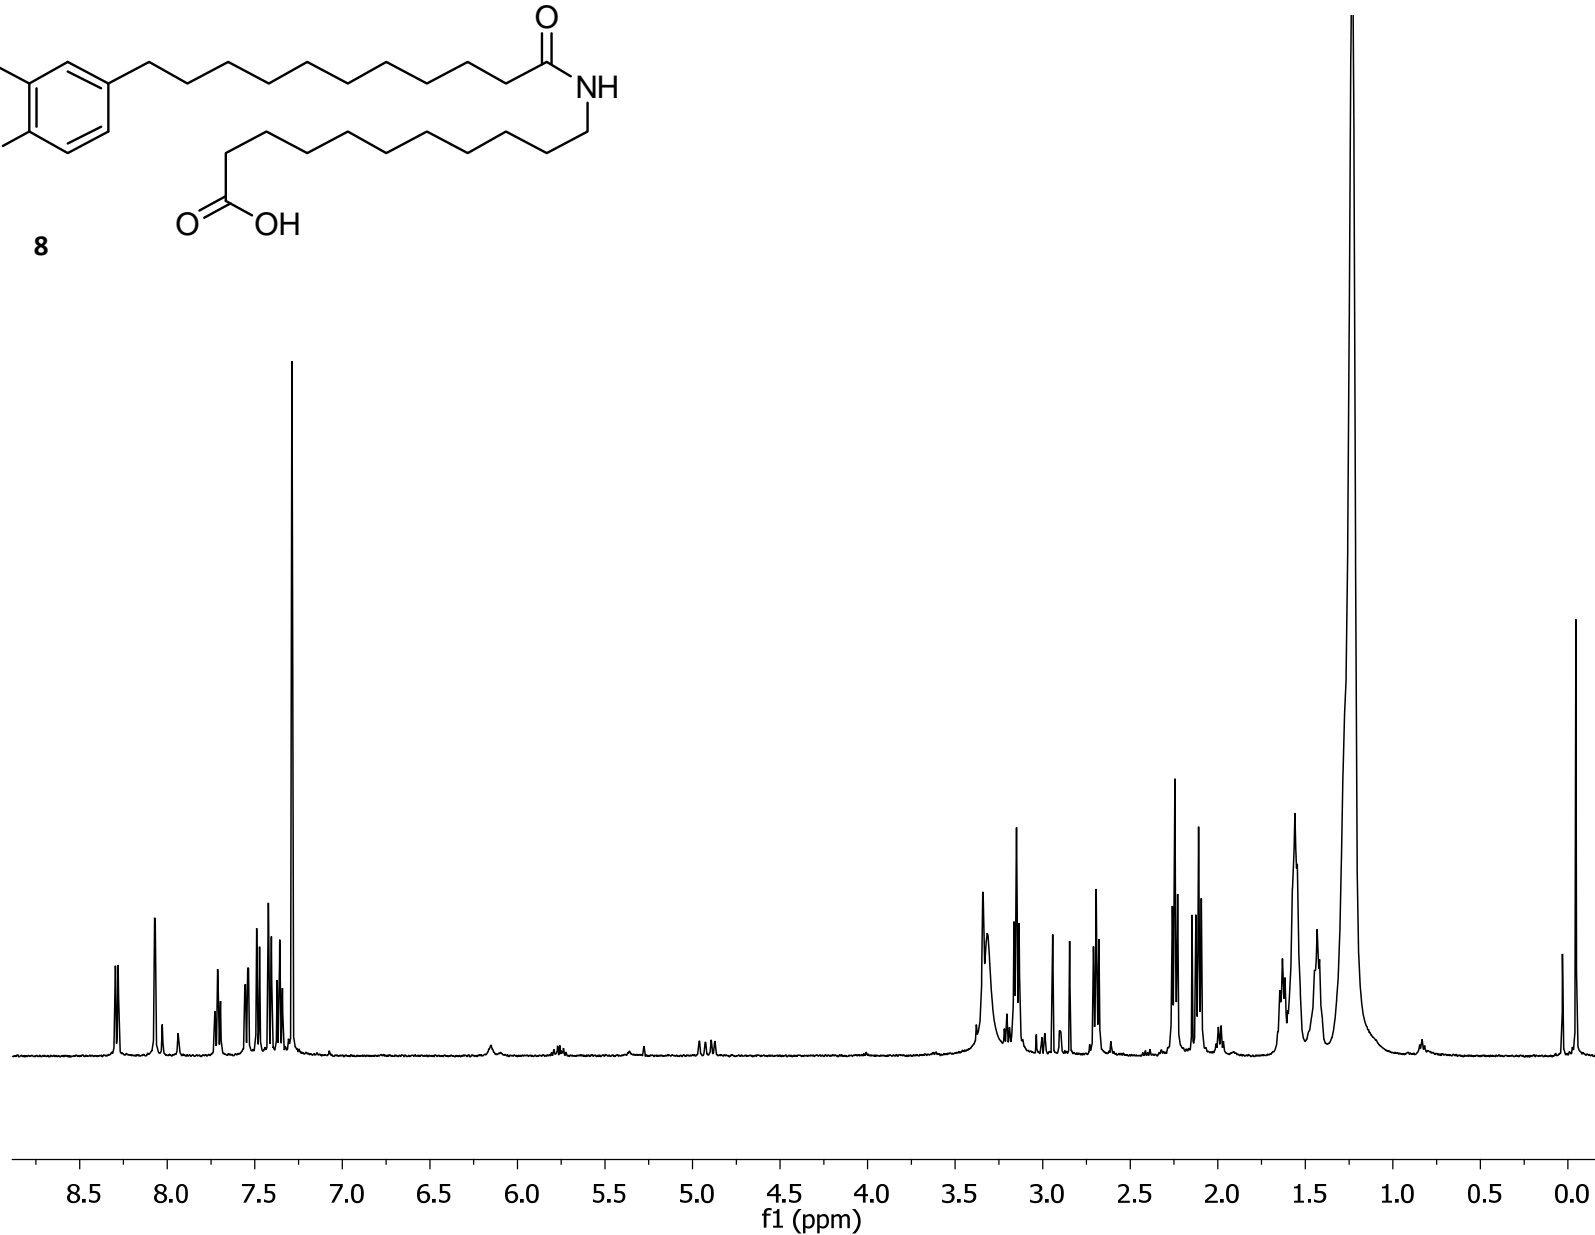



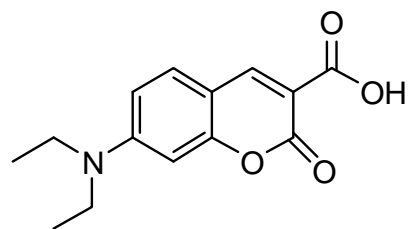

10

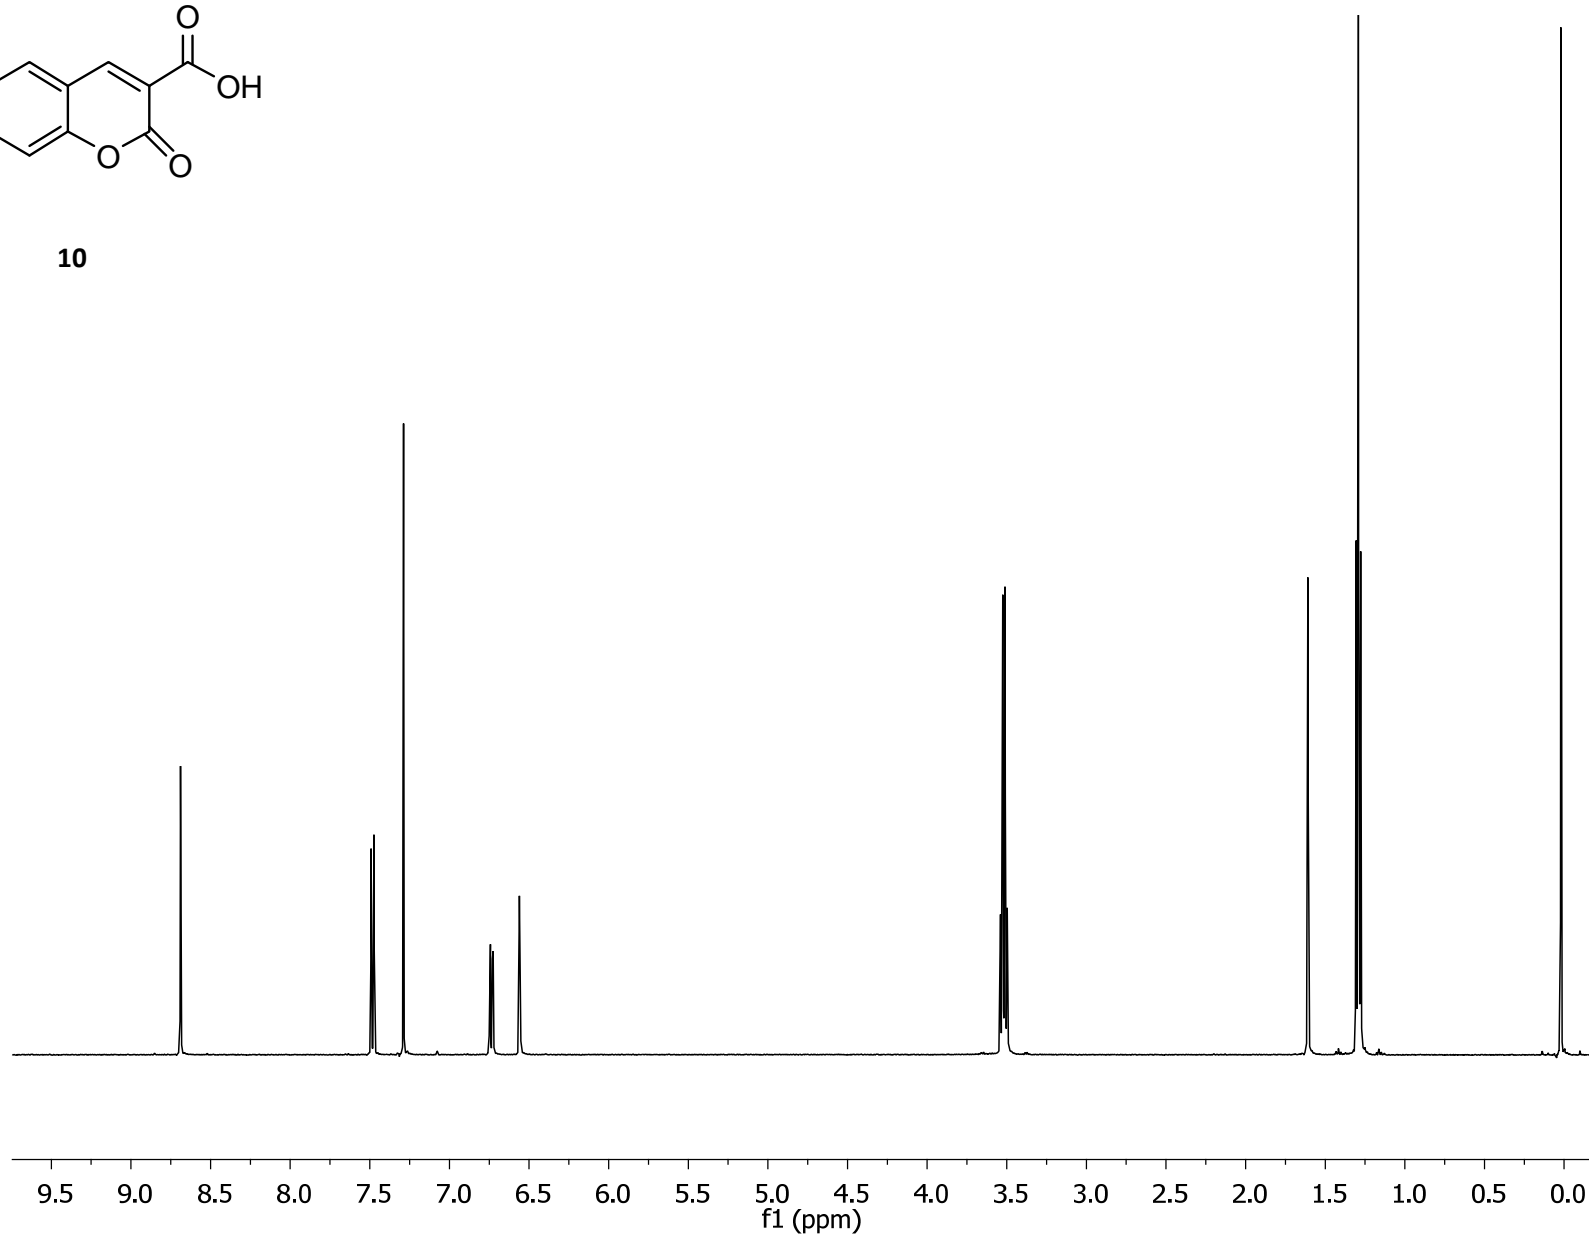



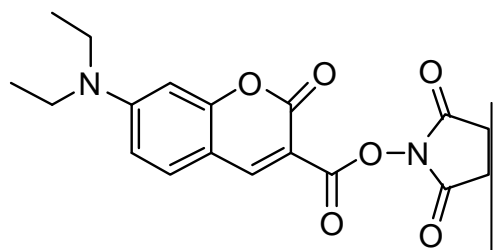

11

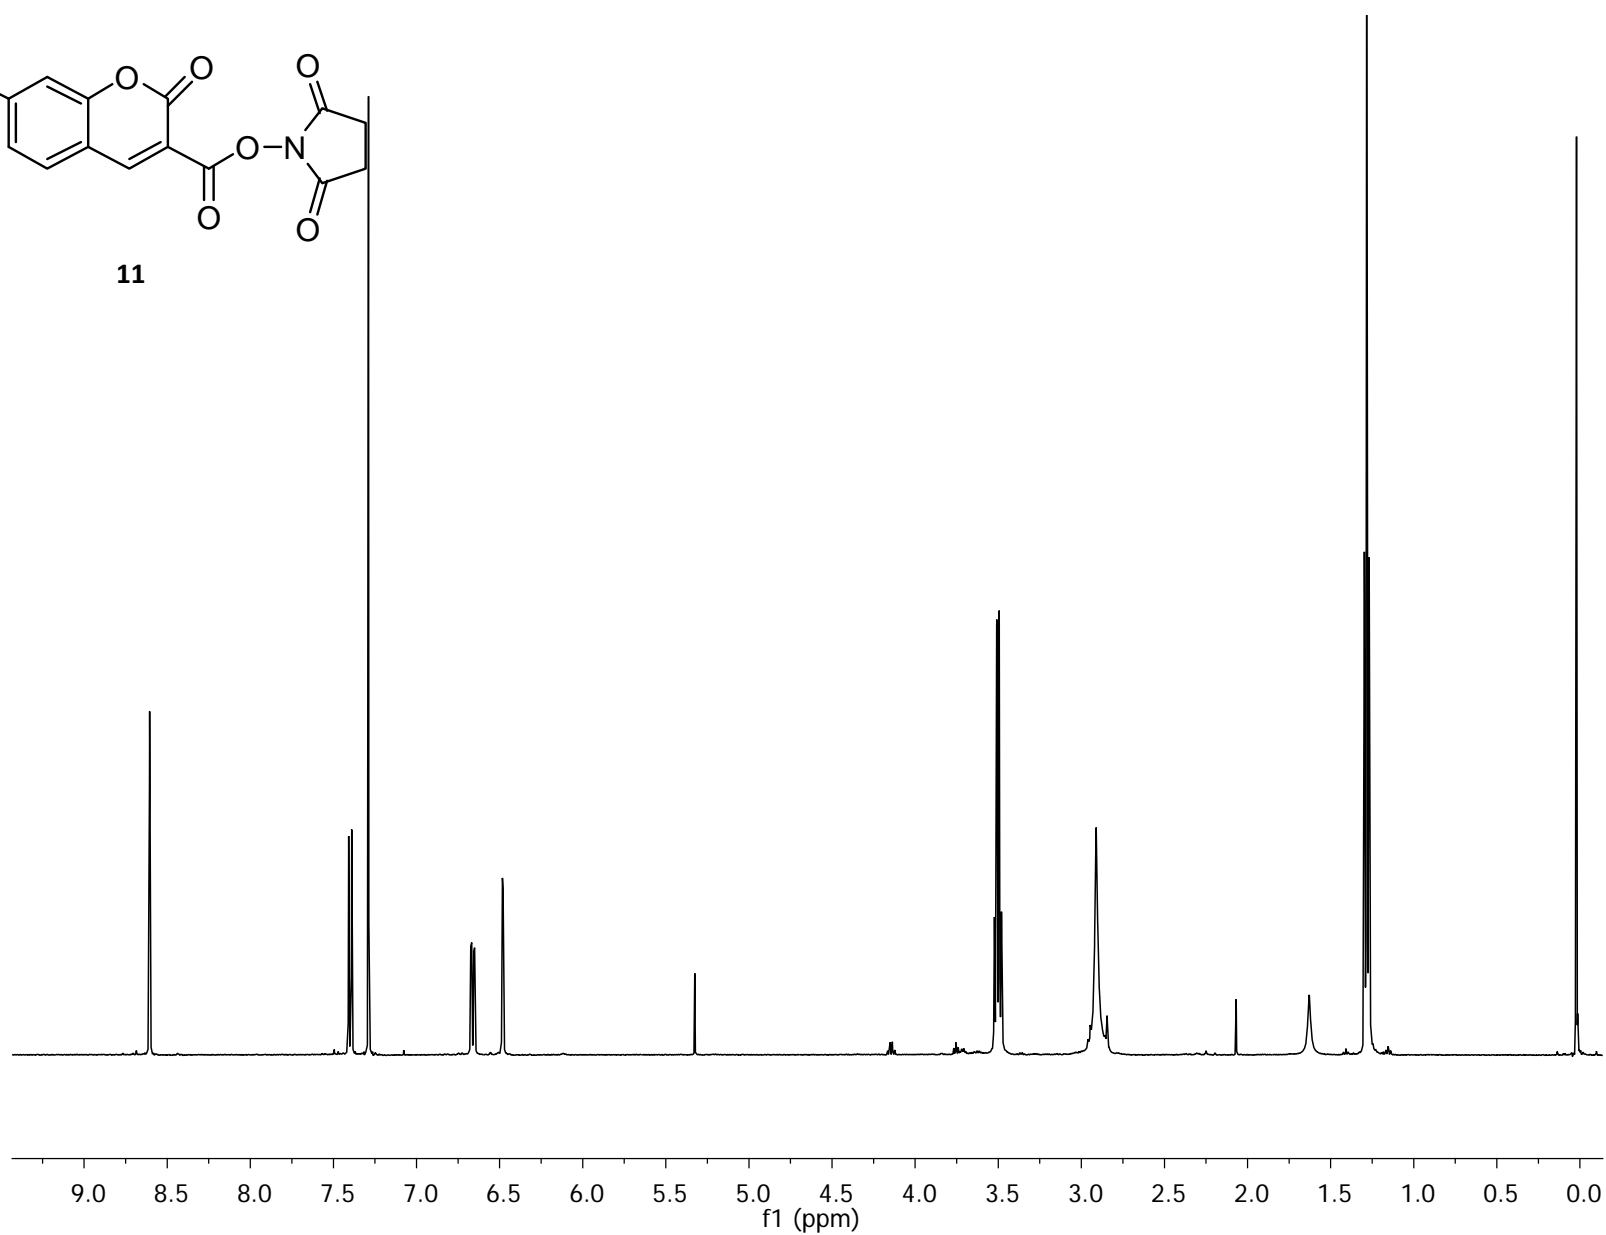

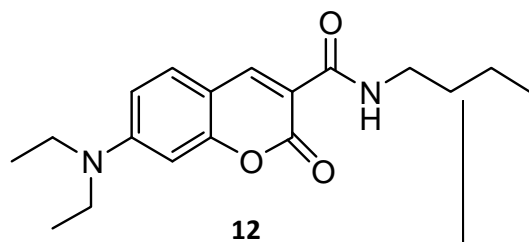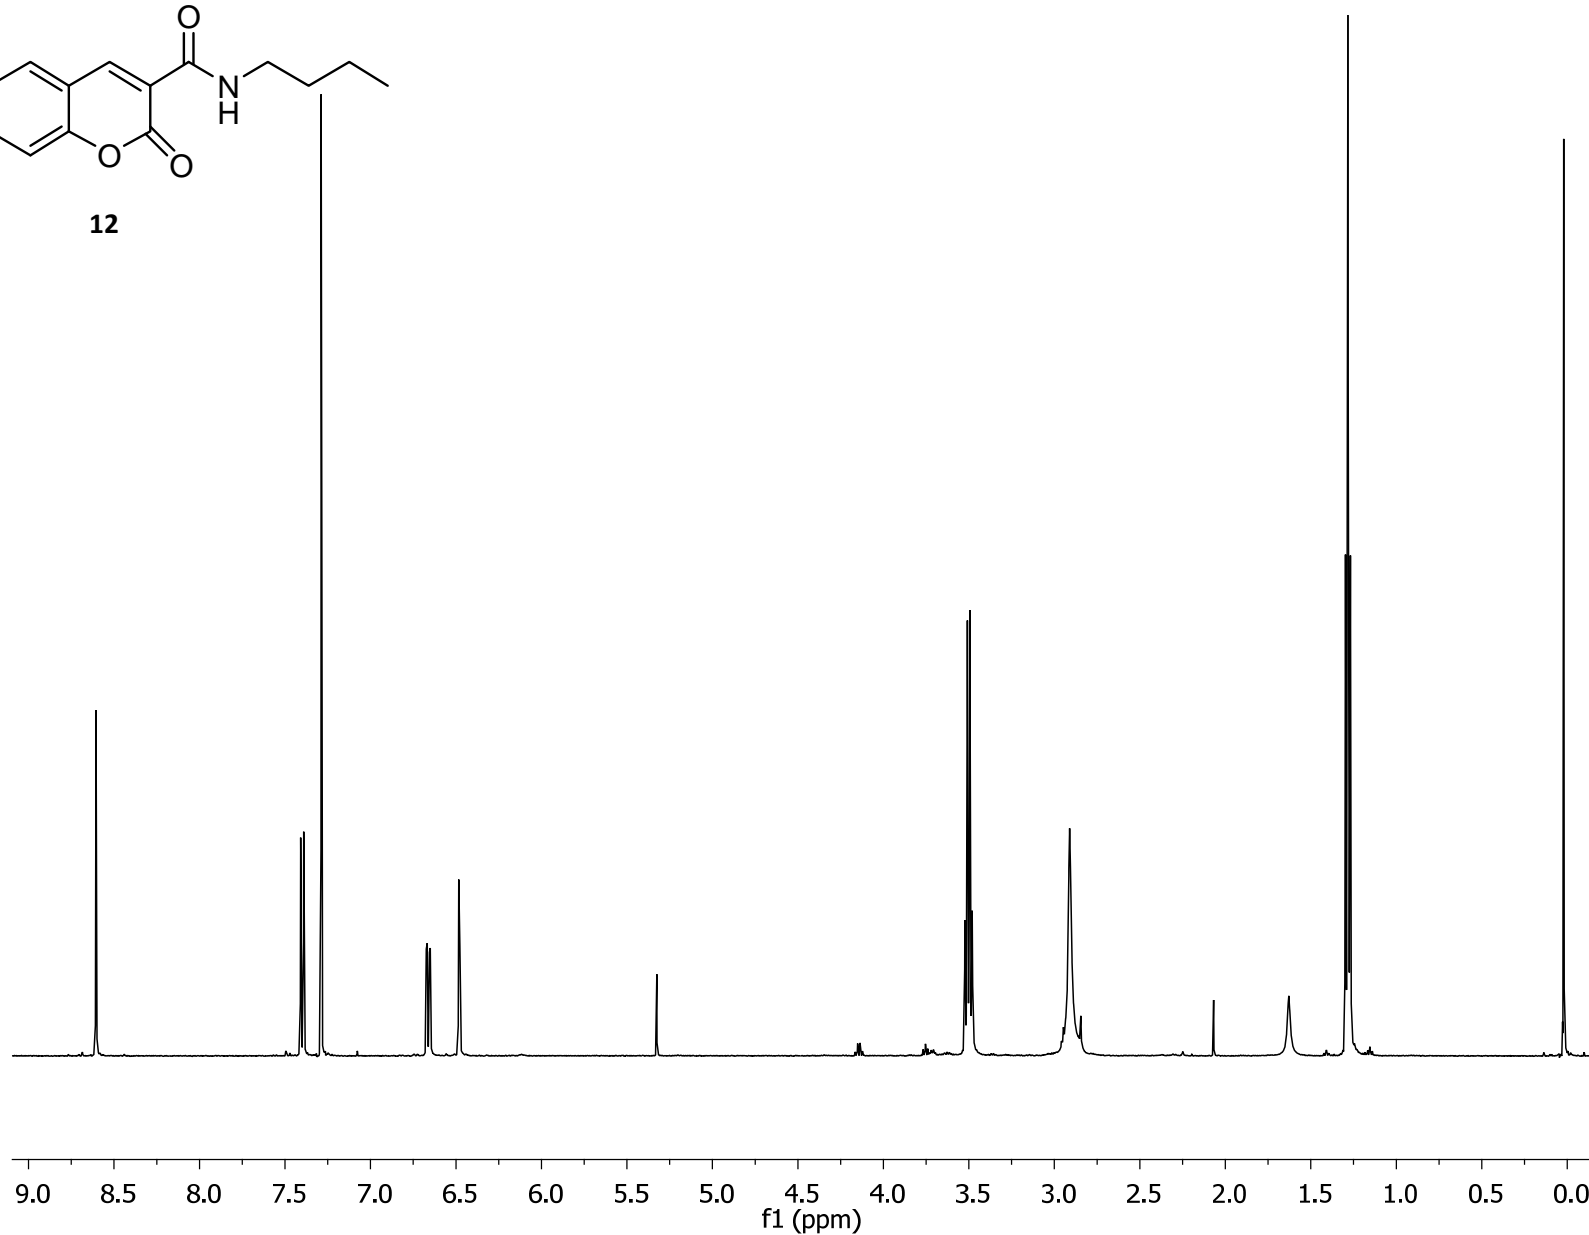

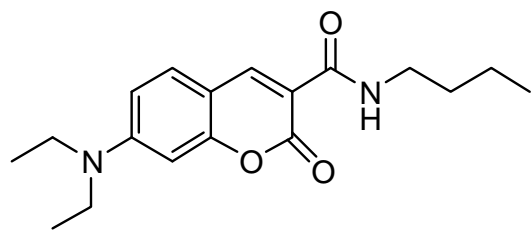

12

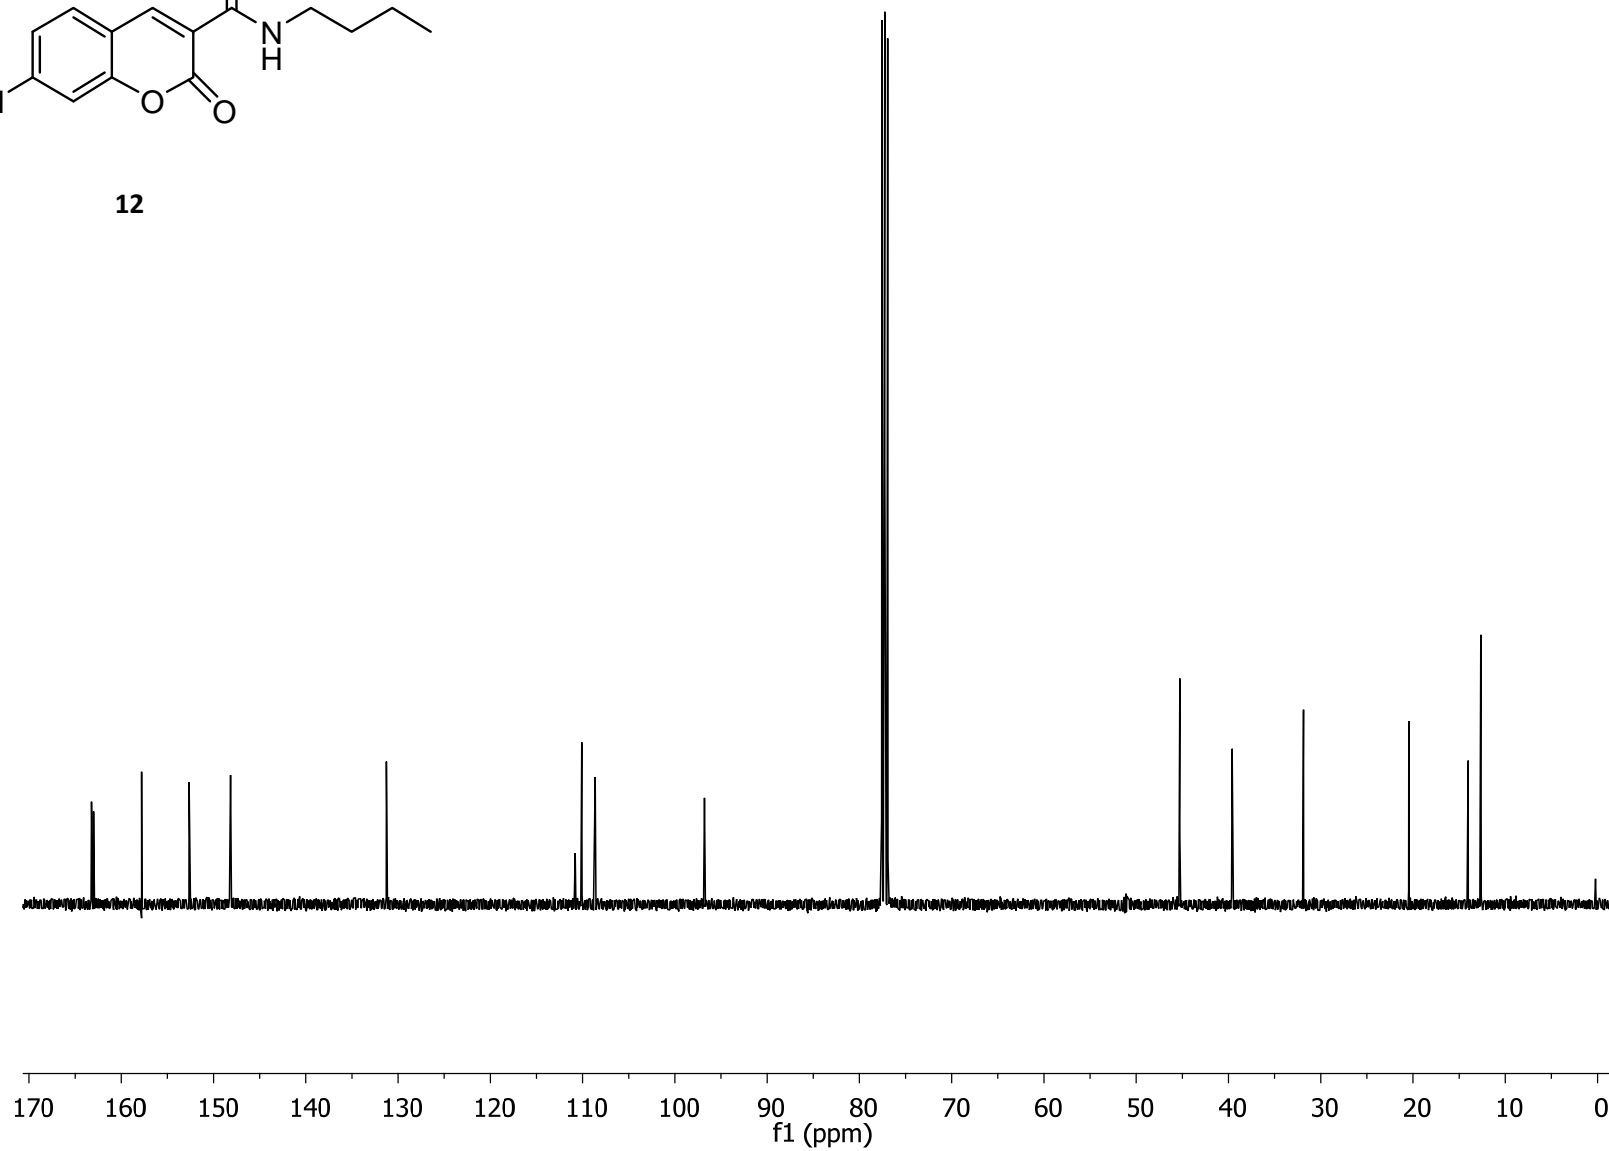

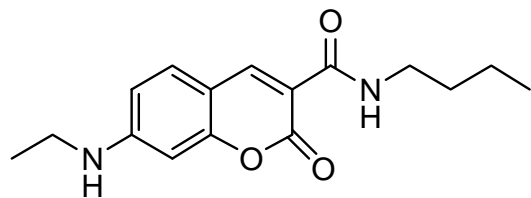

13

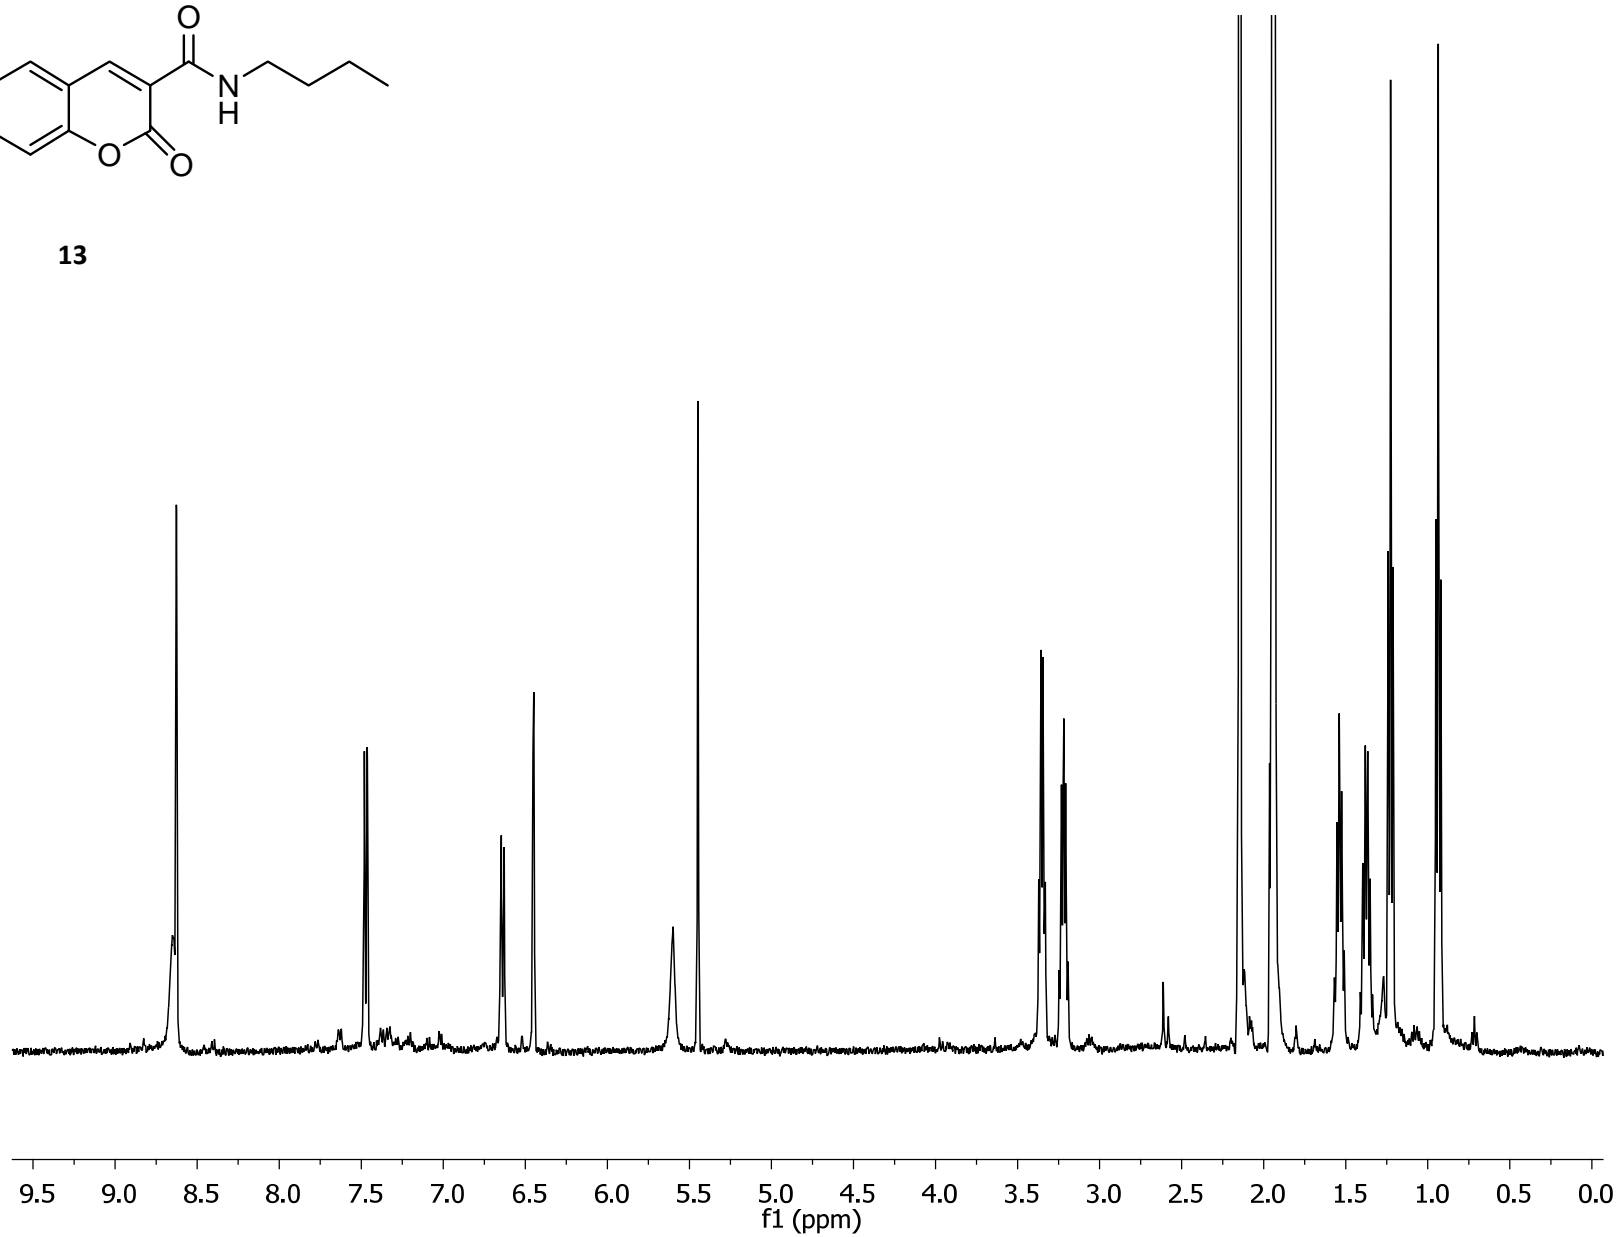

NMR does not detect any ground state binding between *p*-terphenyl and benzophenone in CD<sub>2</sub>Cl<sub>2</sub>

(A) *p*-Terphenyl, 1 mM, CD<sub>2</sub>Cl<sub>2</sub>; (C) benzophenone, 1 mM, CD<sub>2</sub>Cl<sub>2</sub>; (B) a mixture of 1 mM benzophenone and *p*-terphenyl in CD<sub>2</sub>Cl<sub>2</sub>

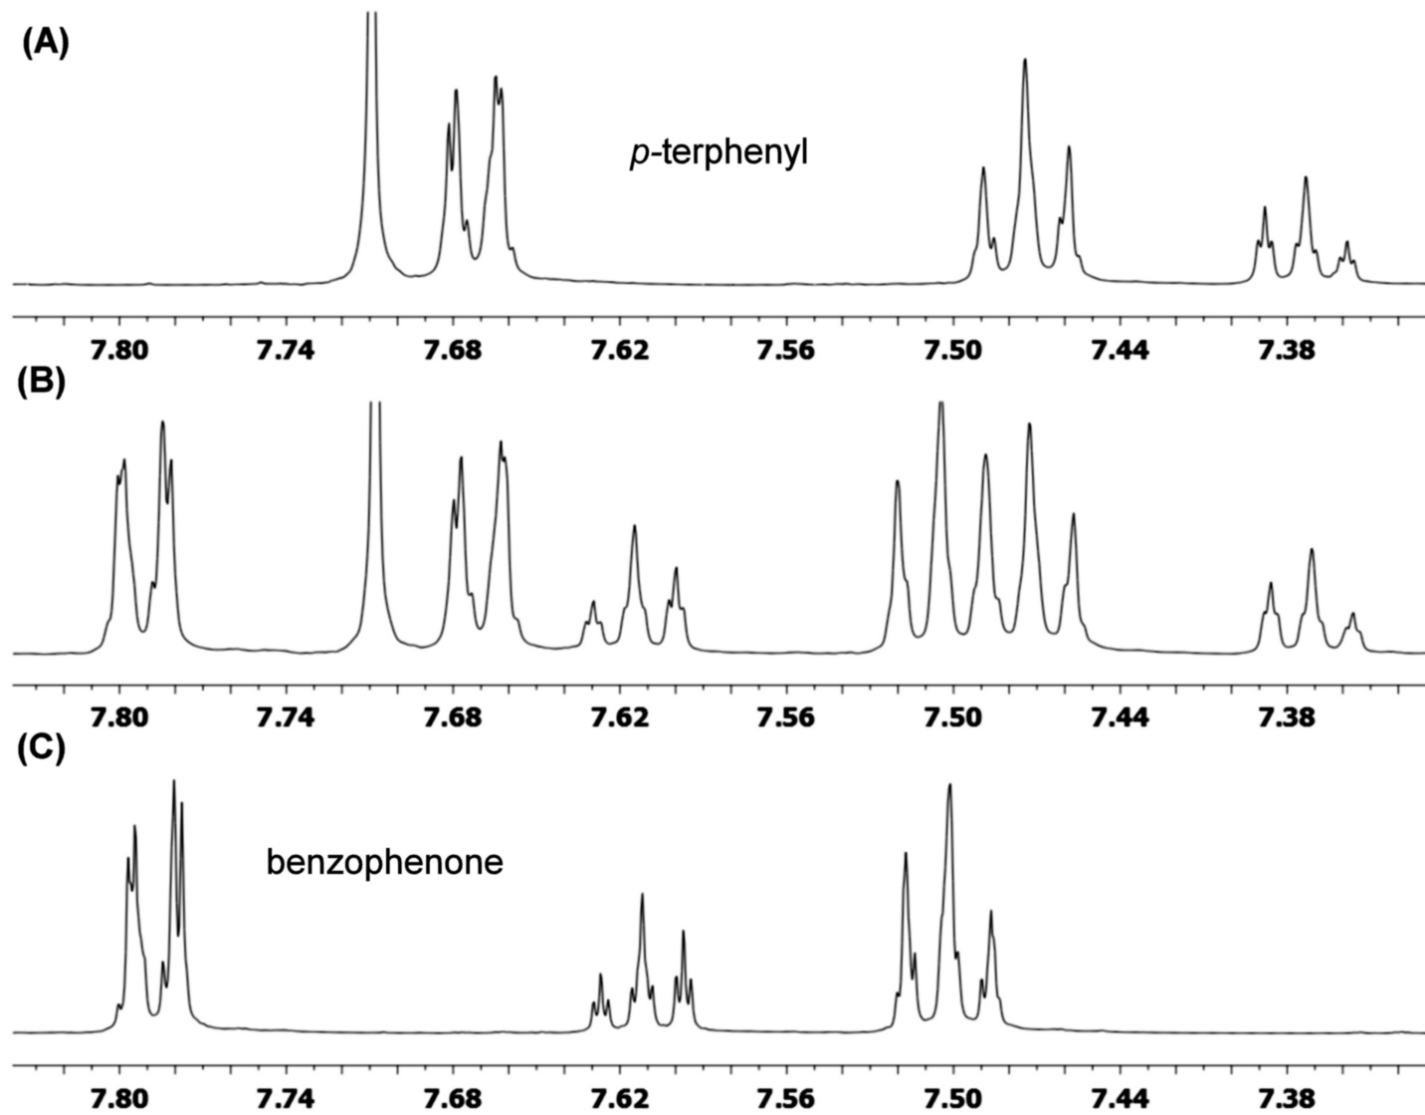

Supplement: NIHMS425645-supplement-supporting_info.pdf [file NIHMS425645-supplement-supporting_info.pdf]
